# Supplementary material for: Impact of solvent processing on the PM6/Y6 morphology and charge transfer in organic solar cells
Source: Royal Society of Chemistry journal article supplement (doi:10.1039/d4tc02885f), 2024-01-01
Supplement: d4tc02885f1.pdf [file d4tc02885f1.pdf]

# Supporting Information

## **Impact of Solvent-Processing for PM6/Y6 Morphology and Charge transfer in Organic Solar Cells**

*Zihao Wen<sup>a</sup>, Rongkun Zhou<sup>b</sup>, Shiping Peng<sup>a</sup>, Yijie Shi<sup>b</sup>, Rui Zhang<sup>c</sup>,*

*Zilong Zheng<sup>b,\*</sup>, Feng Gao<sup>c</sup> and Yi Zhao<sup>a,\*</sup>*

*<sup>a</sup>State Key Laboratory of Physical Chemistry of Solid Surfaces, Fujian Provincial Key Lab of Theoretical and Computational Chemistry, College of Chemistry and Chemical Engineering, Xiamen University, Xiamen, 361005, P. R. China.*

*<sup>b</sup>The Faculty of Materials and Manufacturing, Faculty of Information Technology, Beijing University of Technology, Beijing 100124, China.*

*<sup>c</sup> Department of Physics, Chemistry and Biology (IFM), Linköping University, 58183 Linköping, Sweden.*

Corresponding author E-mail:

[zilong.zheng@bjut.edu.cn](mailto:zilong.zheng@bjut.edu.cn);

[yizhao@xmu.edu.cn](mailto:yizhao@xmu.edu.cn);

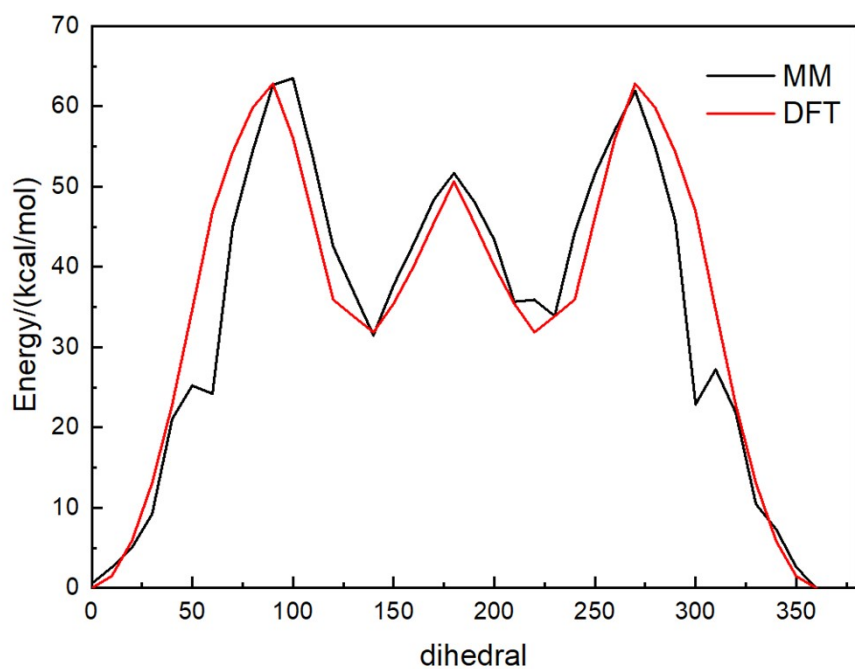

Figure S1. Potential energy curves for the dihedral angle S-C-C-C calculated by DFT and OPLS-AA along with the fitted intrinsic torsion potential

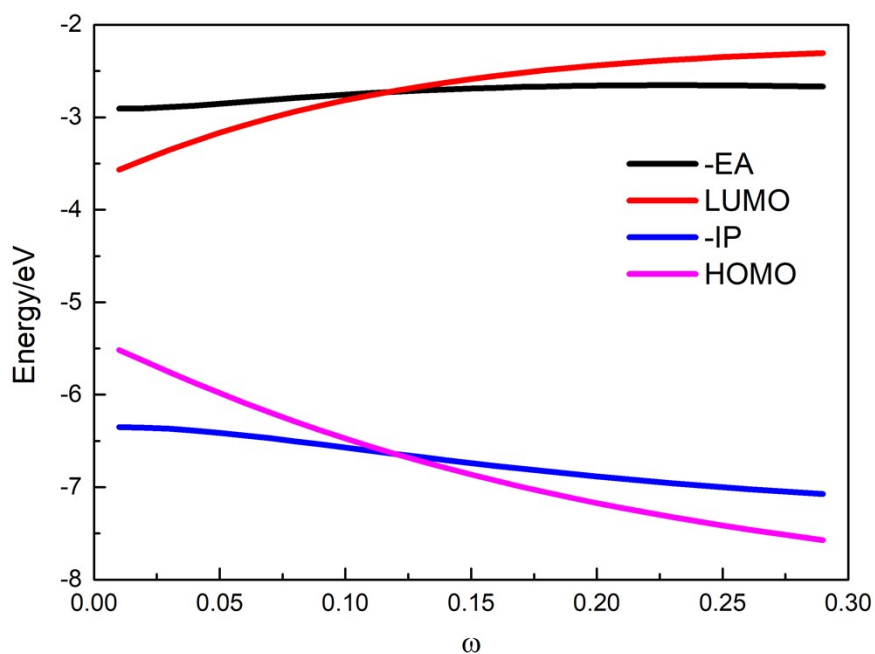

Figure S2. Dependence of -IP, -EA, HOMO, and LUMO energies for the PM6:Y6 complex as a function of the RS parameter,  $\omega$ . The calculations were performed at the  $\omega$ B97XD/def2-SVP level.

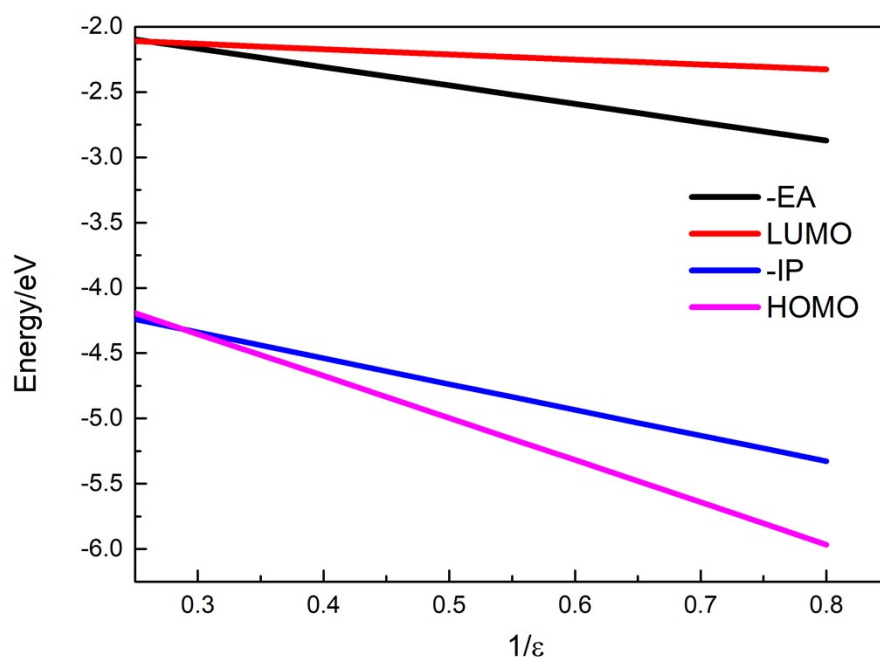

Figure S3. Dependence of -IP, -EA, HOMO, and LUMO energies for the PM6:Y6 complex as a function of  $1/\epsilon$  ( $1/\epsilon = 0.2222 + \beta$ ) in a dielectric medium with  $\epsilon = 4$ . The calculations were performed at the  $\omega$ B97XD/def2-SVP level with  $\omega = \omega_{\text{vac}}$ .

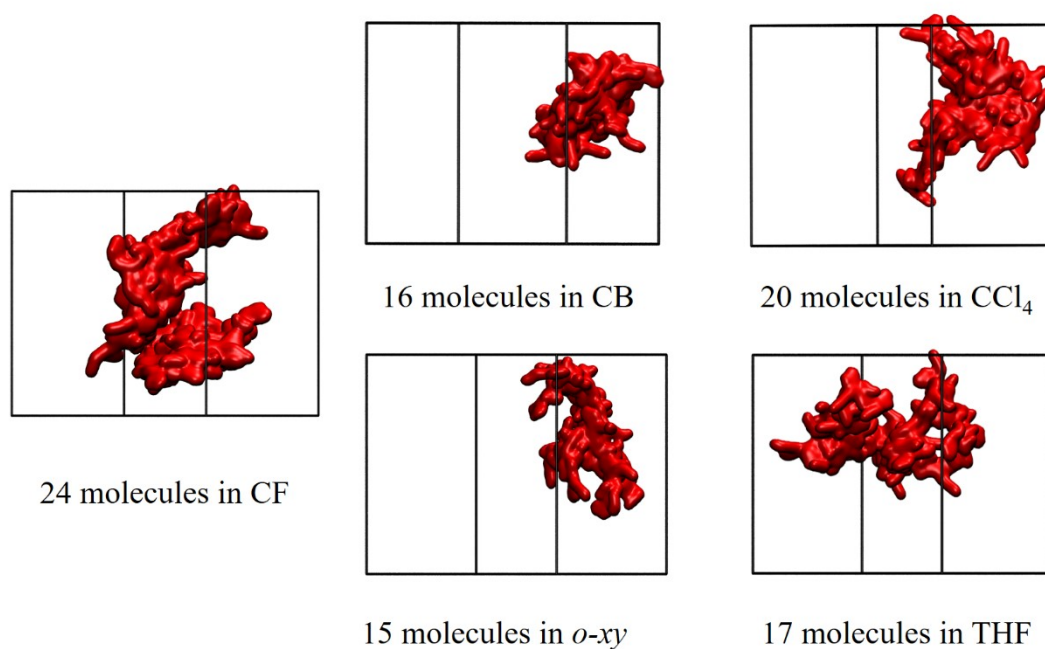

Figure S4: The largest clusters of electron transport network of Y6 acceptors in films treated with different solvents.

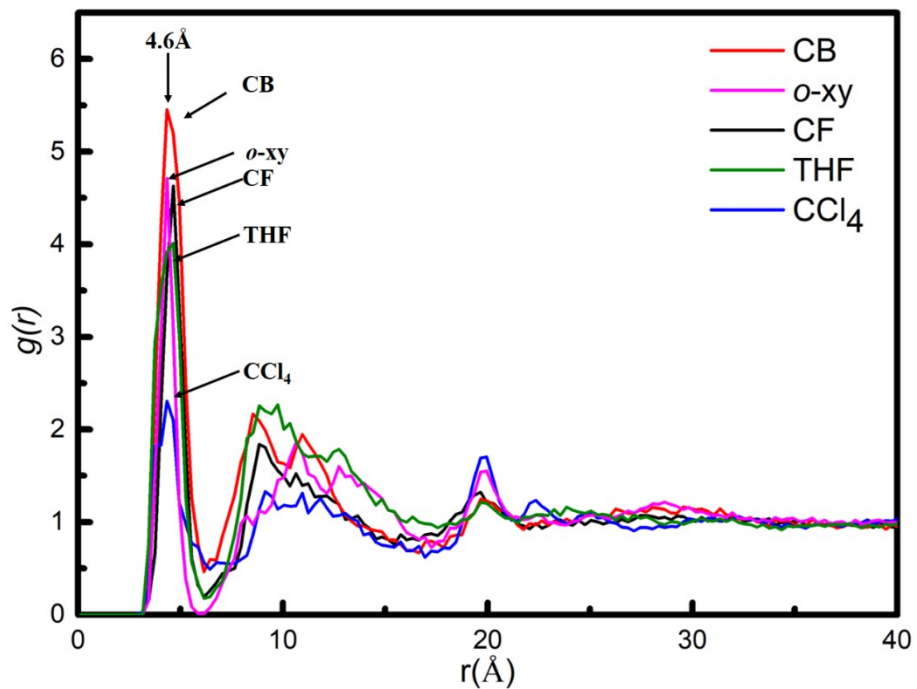

Figure S5. center-of-mass radial distribution functions of the Y6 dimer.

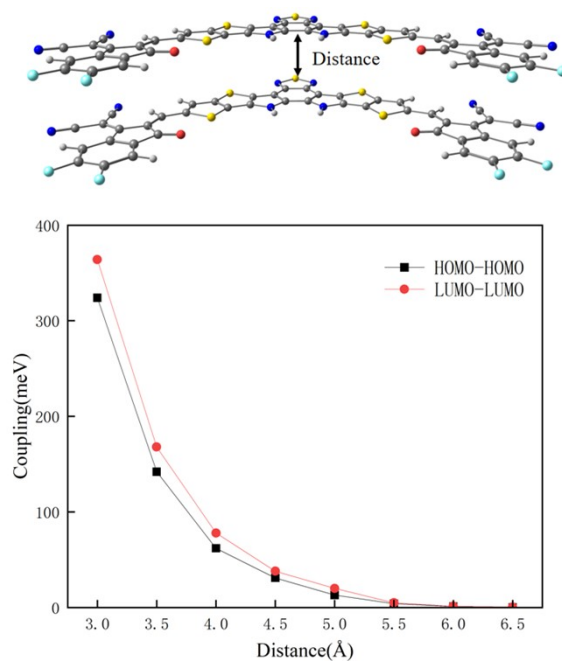

Figure S6. Relationships between distances and coupling of completely face-on Y6 dimers. In general, only some fragments of Y6 will overlap. Thus, we chose  $5 \text{ \AA}$  as the dividing line, below which part of the dimer is still coupled as having a strong coupling.

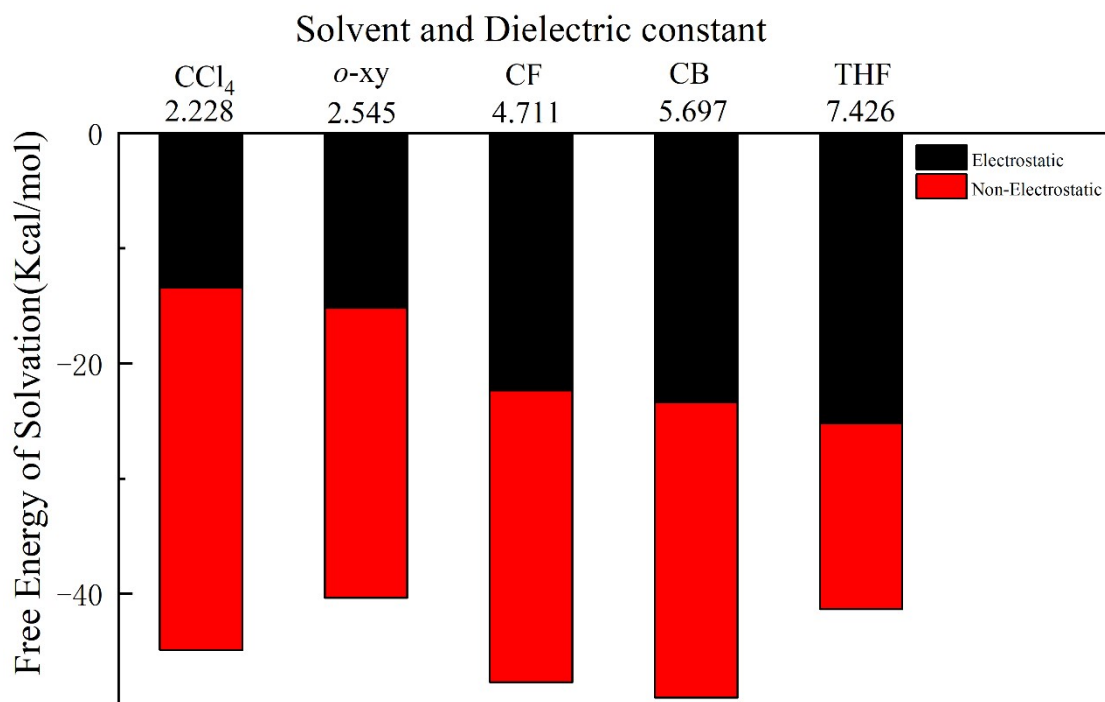

Figure S7. Free energy of solvation for Y6 in different solvents.

Table S1. The solubility limit of Y6 in different solvents.<sup>1</sup>

| Solvents | Solubility (mg/mL) |
|----------|--------------------|
| CF       | 20                 |
| THF      | 12                 |
| CB       | 26                 |

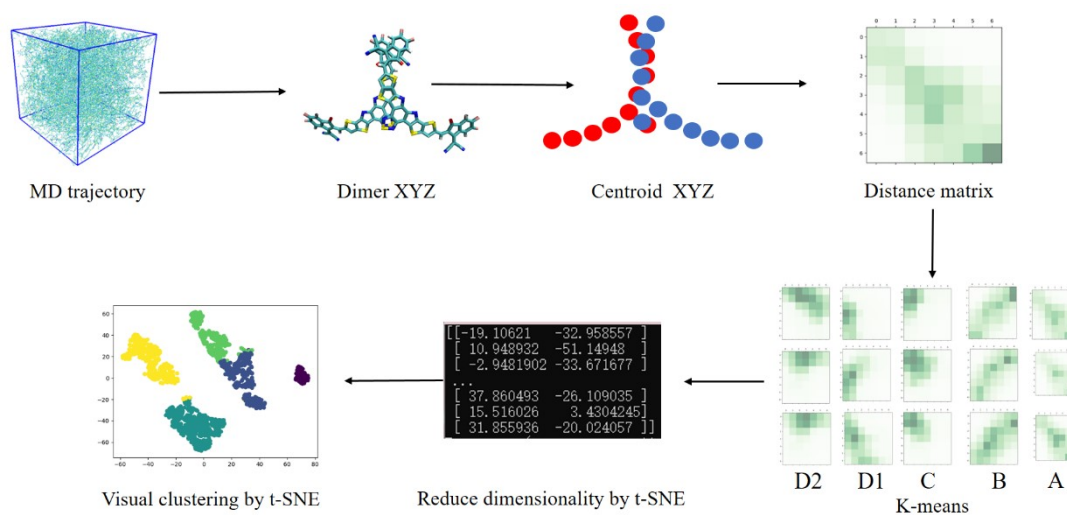

Figure S8. Classification of Y6 dimers or PM6/Y6 complexes by K-means method.<sup>2</sup>

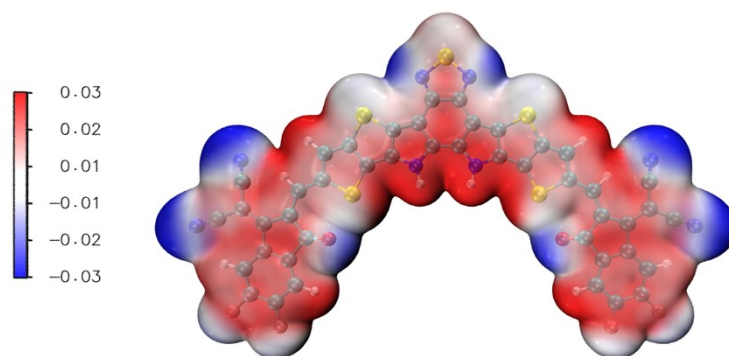

Figure S9. Electrostatic potential graphs of the Y6.

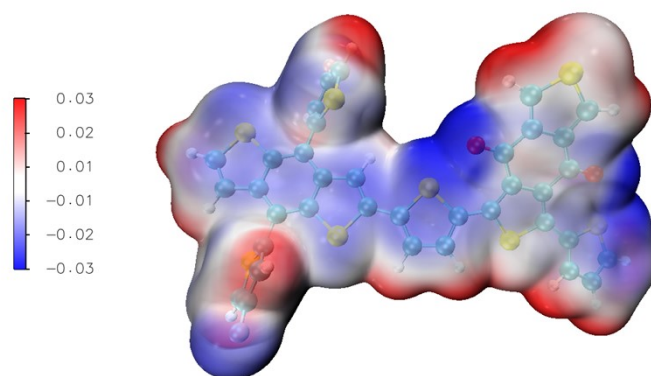

Figure S10. Electrostatic potential graphs of the PM6.

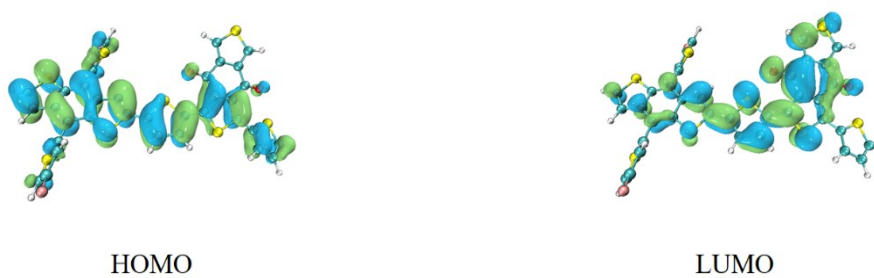

Figure S11. The HOMO and LUMO orbital for the PM6.

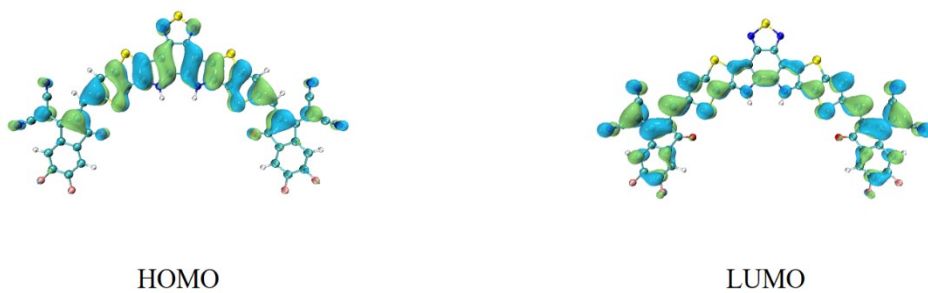

Figure S12. The HOMO and LUMO orbital for the Y6.

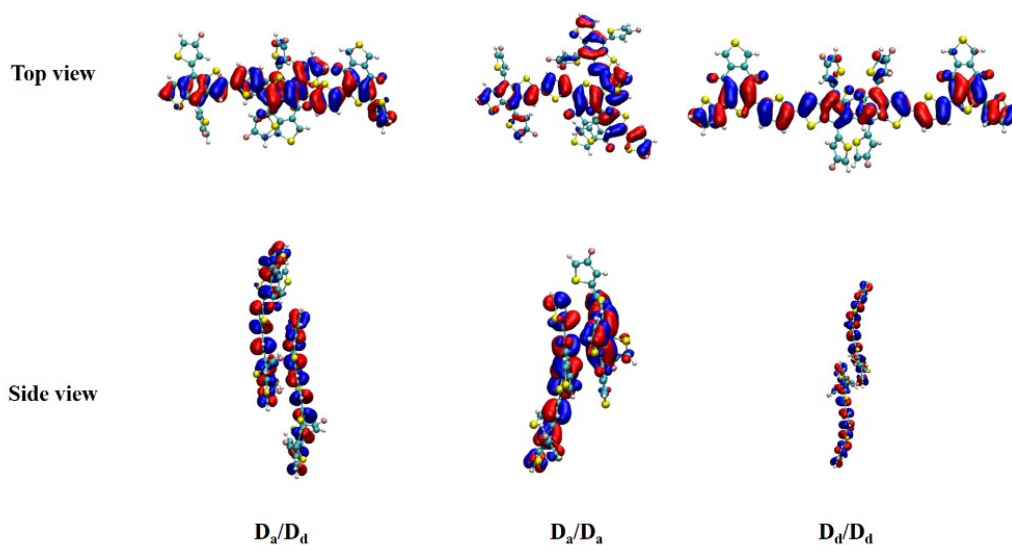

Figure S13. HOMO orbitals in PM6 dimer.

Table S2: Reorganization energies (in meV) for electron transport in A/A domain, hole transport in D/D domain, as well as, charge transfer at D/A interface.

|                                                       | $\lambda(\text{meV})$ |
|-------------------------------------------------------|-----------------------|
| $\text{DD}^+ \rightarrow \text{D}^+\text{D}$          | 246.5                 |
| $\text{AA}^- \rightarrow \text{A}^-\text{A}$          | 147.1                 |
| $\text{D}^*\text{A} \rightarrow \text{D}^+\text{A}^-$ | 122.6                 |
| $\text{DA}^* \rightarrow \text{D}^+\text{A}^-$        | 197.8                 |

Tab. S3. Electronic coupling and rate of  $A_{ad}$ - $A_{ad}$  type Y6 dimer

| pairN  | V        | Ecombin  | rate     |
|--------|----------|----------|----------|
| pair0  | 94.88307 | -28.1855 | 3.57E+13 |
| pair1  | 0.782344 | -18.6207 | 2.42E+09 |
| pair2  | 3.308569 | -22.7677 | 4.34E+10 |
| pair3  | 44.9698  | -21.8743 | 8.01E+12 |
| pair4  | 8.766366 | -19.4716 | 3.04E+11 |
| pair5  | 67.19391 | -26.2283 | 1.79E+13 |
| pair6  | 54.35013 | -27.2048 | 1.17E+13 |
| pair7  | 22.26485 | -24.6617 | 1.96E+12 |
| pair8  | 81.89039 | -22.6742 | 2.66E+13 |
| pair9  | 61.52578 | -23.0122 | 1.5E+13  |
| pair10 | 46.84845 | -23.7888 | 8.69E+12 |
| pair11 | 60.43332 | -21.862  | 1.45E+13 |
| pair12 | 16.22132 | -25.8217 | 1.04E+12 |
| pair13 | 68.17207 | -23.8419 | 1.84E+13 |
| pair14 | 47.42475 | -23.4317 | 8.91E+12 |
| pair15 | 31.28633 | -22.7568 | 3.88E+12 |
| pair16 | 28.48218 | -17.1802 | 3.21E+12 |
| pair17 | 48.18482 | -27.054  | 9.2E+12  |
| pair18 | 74.03536 | -25.5268 | 2.17E+13 |
| pair19 | 73.89593 | -26.8296 | 2.16E+13 |
| pair20 | 81.52713 | -24.0476 | 2.63E+13 |
| pair21 | 29.98096 | -18.2045 | 3.56E+12 |
| pair22 | 88.43267 | -25.3292 | 3.1E+13  |
| pair23 | 55.96389 | -23.3325 | 1.24E+13 |
| pair24 | 62.69095 | -21.5255 | 1.56E+13 |
| pair25 | 50.03325 | -26.3667 | 9.91E+12 |
| pair26 | 31.60108 | -24.7636 | 3.96E+12 |
| pair27 | 36.80788 | -24.7898 | 5.37E+12 |
| pair28 | 18.77247 | -20.9705 | 1.4E+12  |
| pair29 | 72.99502 | -25.3625 | 2.11E+13 |
| pair30 | 2.174919 | -21.7693 | 1.87E+10 |
| pair31 | 53.92431 | -24.0898 | 1.15E+13 |
| pair32 | 17.86129 | -22.7135 | 1.26E+12 |
| pair33 | 33.94886 | -20.2692 | 4.56E+12 |
| pair34 | 35.72006 | -23.649  | 5.05E+12 |
| pair35 | 31.18817 | -24.6966 | 3.85E+12 |
| pair36 | 65.11426 | -27.0824 | 1.68E+13 |
| pair37 | 36.57966 | -18.331  | 5.3E+12  |
| pair38 | 67.11196 | -25.1986 | 1.78E+13 |
| pair39 | 90.65593 | -26.6024 | 3.25E+13 |
| pair40 | 57.28805 | -25.4856 | 1.3E+13  |



|         |          |          |          |
|---------|----------|----------|----------|
| pair41  | 76.42453 | -27.9132 | 2.31E+13 |
| pair42  | 10.84502 | -18.7454 | 4.66E+11 |
| pair43  | 51.31838 | -24.0067 | 1.04E+13 |
| pair44  | 53.34649 | -25.8904 | 1.13E+13 |
| pair45  | 22.63134 | -21.0553 | 2.03E+12 |
| pair46  | 19.15313 | -23.4386 | 1.45E+12 |
| pair47  | 21.44348 | -15.0085 | 1.82E+12 |
| pair48  | 31.11048 | -18.0755 | 3.83E+12 |
| pair49  | 34.97047 | -20.315  | 4.84E+12 |
| Average | 45.53072 | -23.2365 | 8.21E+12 |

Tab. S4. Electronic coupling and rate of  $A_{ad}$ - $A_{da}$  type Y6 dimer

| pairN  | V        | Ecombin  | rate     |
|--------|----------|----------|----------|
| pair0  | 47.55564 | -30.0007 | 8.96E+12 |
| pair1  | 12.60184 | -17.6689 | 6.29E+11 |
| pair2  | 2.461198 | -29.1976 | 2.4E+10  |
| pair3  | 28.11581 | -28.132  | 3.13E+12 |
| pair4  | 7.817681 | -21.6862 | 2.42E+11 |
| pair5  | 27.86537 | -28.2644 | 3.08E+12 |
| pair6  | 10.38353 | -20.3831 | 4.27E+11 |
| pair7  | 1.914442 | -23.3884 | 1.45E+10 |
| pair8  | 14.09456 | -27.7278 | 7.87E+11 |
| pair9  | 28.95152 | -29.7347 | 3.32E+12 |
| pair10 | 1.897673 | -22.4853 | 1.43E+10 |
| pair11 | 56.9093  | -30.3929 | 1.28E+13 |
| pair12 | 10.74778 | -23.8126 | 4.57E+11 |
| pair13 | 26.27409 | -19.2267 | 2.73E+12 |
| pair14 | 11.18128 | -25.7401 | 4.95E+11 |
| pair15 | 1.589608 | -26.3259 | 1E+10    |
| pair16 | 11.3227  | -24.5697 | 5.08E+11 |
| pair17 | 26.7853  | -28.1856 | 2.84E+12 |
| pair18 | 4.974719 | -13.1306 | 9.8E+10  |
| pair19 | 18.63467 | -30.4564 | 1.38E+12 |
| pair20 | 7.015593 | -21.3555 | 1.95E+11 |
| pair21 | 3.647131 | -23.1586 | 5.27E+10 |
| pair22 | 11.77549 | -24.7781 | 5.49E+11 |
| pair23 | 42.32999 | -29.2549 | 7.1E+12  |
| pair24 | 21.13558 | -21.5872 | 1.77E+12 |
| pair25 | 3.647496 | -21.2293 | 5.27E+10 |
| pair26 | 16.33348 | -26.9361 | 1.06E+12 |
| pair27 | 13.72005 | -19.3254 | 7.46E+11 |
| pair28 | 14.06871 | -24.1734 | 7.84E+11 |
| pair29 | 45.38532 | -28.0352 | 8.16E+12 |

|         |          |          |          |
|---------|----------|----------|----------|
| pair30  | 26.39946 | -26.6555 | 2.76E+12 |
| pair31  | 33.64436 | -29.0234 | 4.48E+12 |
| pair32  | 35.17767 | -24.7944 | 4.9E+12  |
| pair33  | 3.629686 | -18.1874 | 5.22E+10 |
| pair34  | 10.93702 | -21.6298 | 4.74E+11 |
| pair35  | 22.72602 | -26.8254 | 2.05E+12 |
| pair36  | 54.88849 | -23.3193 | 1.19E+13 |
| pair37  | 8.50104  | -23.326  | 2.86E+11 |
| pair38  | 0.42409  | -28.9016 | 7.12E+08 |
| pair39  | 22.71675 | -23.9701 | 2.04E+12 |
| pair40  | 26.69592 | -25.9972 | 2.82E+12 |
| pair41  | 39.7601  | -26.8324 | 6.26E+12 |
| pair42  | 43.45401 | -31.7007 | 7.48E+12 |
| pair43  | 5.725936 | -16.5158 | 1.3E+11  |
| pair44  | 8.523273 | -16.2341 | 2.88E+11 |
| pair45  | 42.94084 | -25.6963 | 7.3E+12  |
| pair46  | 14.09611 | -19.6353 | 7.87E+11 |
| pair47  | 6.347657 | -13.0271 | 1.6E+11  |
| pair48  | 2.593955 | -20.9912 | 2.66E+10 |
| pair49  | 42.21205 | -15.5058 | 7.06E+12 |
| Average | 19.65064 | -23.9822 | 1.53E+12 |

Tab. S5. Electronic coupling and rate of A<sub>a</sub>-A<sub>a</sub> type Y6 dimer

| pairN  | V        | Ecombin  | rate     |
|--------|----------|----------|----------|
| pair0  | 11.46974 | -12.0921 | 5.21E+11 |
| pair1  | 27.14757 | -14.8758 | 2.92E+12 |
| pair2  | 5.94844  | -13.6322 | 1.4E+11  |
| pair3  | 30.55777 | -14.7542 | 3.7E+12  |
| pair4  | 13.69279 | -13.8998 | 7.43E+11 |
| pair5  | 5.513226 | -16.335  | 1.2E+11  |
| pair6  | 12.34747 | -13.579  | 6.04E+11 |
| pair7  | 43.68645 | -14.0292 | 7.56E+12 |
| pair8  | 25.01195 | -15.9203 | 2.48E+12 |
| pair9  | 5.782777 | -13.2137 | 1.32E+11 |
| pair10 | 10.11304 | -13.9327 | 4.05E+11 |
| pair11 | 0.261754 | -8.77592 | 2.71E+08 |
| pair12 | 27.93816 | -12.5126 | 3.09E+12 |
| pair13 | 2.929248 | -14.4212 | 3.4E+10  |
| pair14 | 5.468518 | -12.6091 | 1.18E+11 |
| pair15 | 19.00423 | -14.4597 | 1.43E+12 |
| pair16 | 34.91926 | -16.1144 | 4.83E+12 |
| pair17 | 11.64038 | -11.9305 | 5.37E+11 |
| pair18 | 43.99712 | -14.7781 | 7.67E+12 |
| pair19 | 36.28401 | -14.5513 | 5.21E+12 |

|         |          |          |          |
|---------|----------|----------|----------|
| pair20  | 21.10077 | -15.7932 | 1.76E+12 |
| pair21  | 31.26154 | -11.0593 | 3.87E+12 |
| pair22  | 12.70566 | -19.8243 | 6.39E+11 |
| pair23  | 53.67129 | -14.8213 | 1.14E+13 |
| pair24  | 2.986808 | -12.2014 | 3.53E+10 |
| pair25  | 18.86896 | -10.5472 | 1.41E+12 |
| pair26  | 16.55239 | -11.9704 | 1.09E+12 |
| pair27  | 51.34737 | -15.7599 | 1.04E+13 |
| pair28  | 42.31346 | -12.9409 | 7.09E+12 |
| pair29  | 10.39335 | -15.7981 | 4.28E+11 |
| pair30  | 12.36625 | -14.1526 | 6.06E+11 |
| pair31  | 54.79315 | -15.1229 | 1.19E+13 |
| pair32  | 13.83767 | -13.5097 | 7.58E+11 |
| pair33  | 0.644623 | -13.3685 | 1.65E+09 |
| pair34  | 9.762175 | -13.6402 | 3.77E+11 |
| pair35  | 2.581558 | -14.8452 | 2.64E+10 |
| pair36  | 12.30772 | -8.41238 | 6E+11    |
| pair37  | 4.749698 | -9.2309  | 8.93E+10 |
| pair38  | 5.1434   | -12.2484 | 1.05E+11 |
| pair39  | 14.7566  | -14.9119 | 8.62E+11 |
| pair40  | 19.37558 | -14.8946 | 1.49E+12 |
| pair41  | 0.22726  | -12.7293 | 2.05E+08 |
| pair42  | 3.35533  | -11.994  | 4.46E+10 |
| pair43  | 2.599421 | -15.5428 | 2.68E+10 |
| pair44  | 13.04851 | -13.4842 | 6.74E+11 |
| pair45  | 10.94682 | -14.9559 | 4.75E+11 |
| pair46  | 2.001959 | -9.41835 | 1.59E+10 |
| pair47  | 25.90745 | -14.3418 | 2.66E+12 |
| pair48  | 43.01963 | -14.3202 | 7.33E+12 |
| pair49  | 15.13225 | -13.5903 | 9.07E+11 |
| Average | 18.02945 | -13.6369 | 1.29E+12 |

Tab. S6. Electronic coupling and rate of A<sub>a</sub>-A<sub>d</sub> type Y6 dimer

| pairN | V        | Ecombin  | rate     |
|-------|----------|----------|----------|
| pair0 | 13.55671 | -13.8463 | 7.28E+11 |
| pair1 | 32.51245 | -18.5564 | 4.19E+12 |
| pair2 | 4.818774 | -13.5977 | 9.2E+10  |
| pair3 | 26.28229 | -11.4992 | 2.74E+12 |
| pair4 | 2.105516 | -12.0063 | 1.76E+10 |
| pair5 | 53.02524 | -16.8446 | 1.11E+13 |
| pair6 | 8.482583 | -16.9415 | 2.85E+11 |
| pair7 | 6.606184 | -14.3284 | 1.73E+11 |
| pair8 | 1.060411 | -14.5502 | 4.45E+09 |

|         |          |          |          |
|---------|----------|----------|----------|
| pair9   | 18.51473 | -12.8845 | 1.36E+12 |
| pair10  | 11.6832  | -10.8618 | 5.41E+11 |
| pair11  | 1.679035 | -18.7476 | 1.12E+10 |
| pair12  | 15.04642 | -14.4428 | 8.97E+11 |
| pair13  | 1.937146 | -9.99812 | 1.49E+10 |
| pair14  | 34.33691 | -12.6262 | 4.67E+12 |
| pair15  | 12.64309 | -13.95   | 6.33E+11 |
| pair16  | 21.26763 | -11.8743 | 1.79E+12 |
| pair17  | 9.840019 | -15.3269 | 3.83E+11 |
| pair18  | 19.37589 | -16.4501 | 1.49E+12 |
| pair19  | 33.45533 | -18.3655 | 4.43E+12 |
| pair20  | 22.70181 | -17.9937 | 2.04E+12 |
| pair21  | 2.058907 | -15.0846 | 1.68E+10 |
| pair22  | 13.99826 | -12.3026 | 7.76E+11 |
| pair23  | 1.909559 | -14.7179 | 1.44E+10 |
| pair24  | 7.321059 | -12.6938 | 2.12E+11 |
| pair25  | 24.95029 | -16.637  | 2.47E+12 |
| pair26  | 32.74203 | -18.3598 | 4.25E+12 |
| pair27  | 3.989205 | -12.759  | 6.3E+10  |
| pair28  | 17.99647 | -14.6182 | 1.28E+12 |
| pair29  | 9.636609 | -12.7514 | 3.68E+11 |
| pair30  | 36.41597 | -19.2397 | 5.25E+12 |
| pair31  | 3.358607 | -14.3059 | 4.47E+10 |
| pair32  | 19.69425 | -13.2991 | 1.54E+12 |
| pair33  | 6.216829 | -12.0727 | 1.53E+11 |
| pair34  | 7.447183 | -15.5399 | 2.2E+11  |
| pair35  | 1.146748 | -10.6582 | 5.21E+09 |
| pair36  | 13.83432 | -14.7442 | 7.58E+11 |
| pair37  | 1.279979 | -16.3785 | 6.49E+09 |
| pair38  | 26.36809 | -8.44396 | 2.75E+12 |
| pair39  | 24.08351 | -12.9466 | 2.3E+12  |
| pair40  | 24.83266 | -15.621  | 2.44E+12 |
| pair41  | 30.92771 | -16.4951 | 3.79E+12 |
| pair42  | 6.847868 | -17.1784 | 1.86E+11 |
| pair43  | 26.89696 | -10.4024 | 2.87E+12 |
| pair44  | 26.39736 | -18.5187 | 2.76E+12 |
| pair45  | 28.44072 | -15.3148 | 3.2E+12  |
| pair46  | 9.734804 | -15.2271 | 3.75E+11 |
| pair47  | 35.76587 | -11.9731 | 5.07E+12 |
| pair48  | 12.61675 | -16.8713 | 6.3E+11  |
| pair49  | 29.90331 | -20.7067 | 3.54E+12 |
| Average | 16.75486 | -14.6311 | 1.11E+12 |

Table. S7. Hole coupling and hole-transform rate of D<sub>a</sub>-D<sub>d</sub> type PM6 dimer

| DDN  | V        | Ecombin  | rate     |
|------|----------|----------|----------|
| DD0  | 34.60851 | -11.9056 | 1.2E+12  |
| DD1  | 15.32442 | -14.1573 | 2.36E+11 |
| DD2  | 22.44266 | -12.0571 | 5.05E+11 |
| DD3  | 17.61577 | -11.7652 | 3.11E+11 |
| DD4  | 30.41234 | -12.3379 | 9.28E+11 |
| DD5  | 23.23323 | -12.1404 | 5.41E+11 |
| DD6  | 1.291811 | -11.4436 | 1.67E+09 |
| DD7  | 22.81889 | -12.1166 | 5.22E+11 |
| DD8  | 38.42225 | -13.308  | 1.48E+12 |
| DD9  | 26.43751 | -11.0429 | 7.01E+11 |
| DD10 | 35.16674 | -12.3344 | 1.24E+12 |
| DD11 | 12.60955 | -11.1555 | 1.59E+11 |
| DD12 | 17.89472 | -14.2069 | 3.21E+11 |
| DD13 | 31.53266 | -17.6241 | 9.97E+11 |
| DD14 | 33.89273 | -17.8708 | 1.15E+12 |
| DD15 | 54.18921 | -17.7035 | 2.95E+12 |
| DD16 | 76.23091 | -16.0953 | 5.83E+12 |
| DD17 | 47.9932  | -19.0585 | 2.31E+12 |
| DD18 | 66.48768 | -19.4351 | 4.43E+12 |
| DD19 | 44.42823 | -17.0975 | 1.98E+12 |
| DD20 | 63.36648 | -16.6384 | 4.03E+12 |
| DD21 | 38.17766 | -18.8274 | 1.46E+12 |
| DD22 | 59.70493 | -18.3636 | 3.58E+12 |
| DD23 | 70.98859 | -13.4253 | 5.05E+12 |
| DD24 | 5.165785 | -12.7376 | 2.68E+10 |
| DD25 | 26.96312 | -16.1284 | 7.29E+11 |
| DD26 | 24.07251 | -13.8903 | 5.81E+11 |
| DD27 | 34.84144 | -13.2455 | 1.22E+12 |
| DD28 | 27.3102  | -10.909  | 7.48E+11 |
| DD29 | 11.55613 | -12.869  | 1.34E+11 |
| DD30 | 20.60165 | -12.7983 | 4.26E+11 |
| DD31 | 1.239107 | -13.223  | 1.54E+09 |
| DD32 | 6.917662 | -13.2567 | 4.8E+10  |
| DD33 | 5.18174  | -14.0072 | 2.69E+10 |
| DD34 | 38.01983 | -14.6674 | 1.45E+12 |
| DD35 | 2.537771 | -16.2043 | 6.46E+09 |
| DD36 | 17.45027 | -18.8189 | 3.05E+11 |
| DD37 | 19.41391 | -26.6014 | 3.78E+11 |
| DD38 | 20.93175 | -11.7957 | 4.39E+11 |
| DD39 | 60.51373 | -15.3523 | 3.67E+12 |
| DD40 | 64.29762 | -13.6912 | 4.15E+12 |
| DD41 | 16.3323  | -13.923  | 2.68E+11 |
| DD42 | 7.197228 | -8.5001  | 5.2E+10  |

|         |          |          |          |
|---------|----------|----------|----------|
| DD43    | 19.92836 | -14.6973 | 3.98E+11 |
| DD44    | 62.39584 | -23.8962 | 3.9E+12  |
| DD45    | 16.94183 | -11.9475 | 2.88E+11 |
| DD46    | 10.82727 | -13.3821 | 1.18E+11 |
| DD47    | 5.081872 | -13.1067 | 2.59E+10 |
| DD48    | 1.753917 | -12.9326 | 3.09E+09 |
| DD49    | 28.46165 | -15.0068 | 8.12E+11 |
| Average | 28.8241  | -14.594  | 8.33E+11 |

Table S8. Hole coupling and hole-transform rate of  $D_d$ - $D_d$  type PM6 dimer

| DDN  | V        | Ecombin | rate     |
|------|----------|---------|----------|
| DD0  | 3.229337 | 6142523 | 1.05E+10 |
| DD1  | 1.125507 | 6142521 | 1.27E+09 |
| DD2  | 0.189667 | 6142483 | 36080425 |
| DD3  | 12.06103 | 6142497 | 1.46E+11 |
| DD4  | 19.84233 | 6142501 | 3.95E+11 |
| DD5  | 4.316867 | 6142503 | 1.87E+10 |
| DD6  | 11.88422 | 6142504 | 1.42E+11 |
| DD7  | 2.037642 | 6142533 | 4.16E+09 |
| DD8  | 0.415564 | 6142561 | 1.73E+08 |
| DD9  | 2.940152 | 6142530 | 8.67E+09 |
| DD10 | 7.065553 | 6142499 | 5.01E+10 |
| DD11 | 3.0423   | 6142508 | 9.28E+09 |
| DD12 | 3.873404 | 6142515 | 1.5E+10  |
| DD13 | 7.476416 | 6142525 | 5.61E+10 |
| DD14 | 22.85717 | 6142507 | 5.24E+11 |
| DD15 | 7.958293 | 6142524 | 6.35E+10 |
| DD16 | 7.295163 | 6142523 | 5.34E+10 |
| DD17 | 1.975372 | 6142557 | 3.91E+09 |
| DD18 | 12.40452 | 6142553 | 1.54E+11 |
| DD19 | 13.88806 | 6142489 | 1.93E+11 |
| DD20 | 4.316284 | 6142517 | 1.87E+10 |
| DD21 | 19.53043 | 6142561 | 3.83E+11 |
| DD22 | 54.23889 | 6142542 | 2.95E+12 |
| DD23 | 18.6726  | 6142570 | 3.5E+11  |
| DD24 | 41.60882 | 6142507 | 1.74E+12 |
| DD25 | 1.674778 | 6142555 | 2.81E+09 |
| DD26 | 25.77844 | 6142540 | 6.67E+11 |
| DD27 | 25.00218 | 6142546 | 6.27E+11 |
| DD28 | 6.466278 | 6142532 | 4.19E+10 |
| DD29 | 1.975372 | 6142557 | 3.91E+09 |
| DD30 | 13.25205 | 6142508 | 1.76E+11 |
| DD31 | 2.17263  | 6142543 | 4.73E+09 |
| DD32 | 0.470611 | 6142522 | 2.22E+08 |

|         |          |         |          |
|---------|----------|---------|----------|
| DD33    | 3.77264  | 6142532 | 1.43E+10 |
| DD34    | 1.816722 | 6142566 | 3.31E+09 |
| DD35    | 8.840285 | 6142580 | 7.84E+10 |
| DD36    | 8.219979 | 6142561 | 6.78E+10 |
| DD37    | 2.382556 | 6142595 | 5.69E+09 |
| DD38    | 0.826715 | 6142490 | 6.85E+08 |
| DD39    | 21.53503 | 6142528 | 4.65E+11 |
| DD40    | 2.908676 | 6142481 | 8.49E+09 |
| DD41    | 3.017071 | 6142482 | 9.13E+09 |
| DD42    | 3.96442  | 6142532 | 1.58E+10 |
| DD43    | 2.715342 | 6142524 | 7.39E+09 |
| DD44    | 15.09313 | 6142559 | 2.28E+11 |
| DD45    | 15.09313 | 6142559 | 2.28E+11 |
| DD46    | 59.33879 | 6142531 | 3.53E+12 |
| DD47    | 15.82525 | 6142542 | 2.51E+11 |
| DD48    | 3.124743 | 6142535 | 9.79E+09 |
| DD49    | 12.33067 | 6142514 | 1.52E+11 |
| Average | 10.83686 | 6142529 | 1.18E+11 |

Table S9. Hole coupling and hole-transform rate of D<sub>a</sub>-D<sub>a</sub> type PM6 dimer

| DDN  | V        | Ecombin | rate     |
|------|----------|---------|----------|
| DD0  | 0.301672 | 6142522 | 91276314 |
| DD1  | 0.432885 | 6142491 | 1.88E+08 |
| DD2  | 13.34149 | 6142505 | 1.79E+11 |
| DD3  | 2.536635 | 6142547 | 6.45E+09 |
| DD4  | 3.167545 | 6142547 | 1.01E+10 |
| DD5  | 4.89377  | 6142558 | 2.4E+10  |
| DD6  | 16.2489  | 6142528 | 2.65E+11 |
| DD7  | 1.764092 | 6142567 | 3.12E+09 |
| DD8  | 0.427529 | 6142521 | 1.83E+08 |
| DD9  | 2.546768 | 6142543 | 6.51E+09 |
| DD10 | 3.923932 | 6142524 | 1.54E+10 |
| DD11 | 25.61059 | 6142513 | 6.58E+11 |
| DD12 | 18.91301 | 6142546 | 3.59E+11 |
| DD13 | 52.47206 | 6142514 | 2.76E+12 |
| DD14 | 21.93807 | 6142481 | 4.83E+11 |
| DD15 | 21.93807 | 6142481 | 4.83E+11 |
| DD16 | 4.984584 | 6142566 | 2.49E+10 |
| DD17 | 43.43424 | 6142524 | 1.89E+12 |
| DD18 | 25.73851 | 6142531 | 6.64E+11 |
| DD19 | 44.98276 | 6142574 | 2.03E+12 |
| DD20 | 9.583659 | 6142550 | 9.21E+10 |
| DD21 | 55.71208 | 6142548 | 3.11E+12 |
| DD22 | 30.52819 | 6142554 | 9.35E+11 |

|         |          |         |          |
|---------|----------|---------|----------|
| DD23    | 0.400047 | 6142523 | 1.61E+08 |
| DD24    | 23.26554 | 6142519 | 5.43E+11 |
| DD25    | 9.226142 | 6142527 | 8.54E+10 |
| DD26    | 7.016583 | 6142541 | 4.94E+10 |
| DD27    | 35.12697 | 6142579 | 1.24E+12 |
| DD28    | 19.68566 | 6142526 | 3.89E+11 |
| DD29    | 51.48054 | 6142534 | 2.66E+12 |
| DD30    | 5.591926 | 6142544 | 3.14E+10 |
| DD31    | 27.28504 | 6142554 | 7.47E+11 |
| DD32    | 2.590128 | 6142544 | 6.73E+09 |
| DD33    | 0.184788 | 6142515 | 34248032 |
| DD34    | 0.441734 | 6142474 | 1.96E+08 |
| DD35    | 0.829392 | 6142500 | 6.9E+08  |
| DD36    | 1.18669  | 6142490 | 1.41E+09 |
| DD37    | 47.8417  | 6142548 | 2.3E+12  |
| DD38    | 32.0206  | 6142592 | 1.03E+12 |
| DD39    | 0.3989   | 6142575 | 1.6E+08  |
| DD40    | 76.12438 | 6142503 | 5.81E+12 |
| DD41    | 50.09278 | 6142561 | 2.52E+12 |
| DD42    | 68.84911 | 6142553 | 4.75E+12 |
| DD43    | 17.85704 | 6142527 | 3.2E+11  |
| DD44    | 4.27767  | 6142559 | 1.84E+10 |
| DD45    | 61.3335  | 6142552 | 3.77E+12 |
| DD46    | 1.020088 | 6142517 | 1.04E+09 |
| DD47    | 50.77305 | 6142533 | 2.59E+12 |
| DD48    | 89.52005 | 6142540 | 8.04E+12 |
| DD49    | 21.69239 | 6142517 | 4.72E+11 |
| Average | 22.23067 | 6142534 | 4.96E+11 |

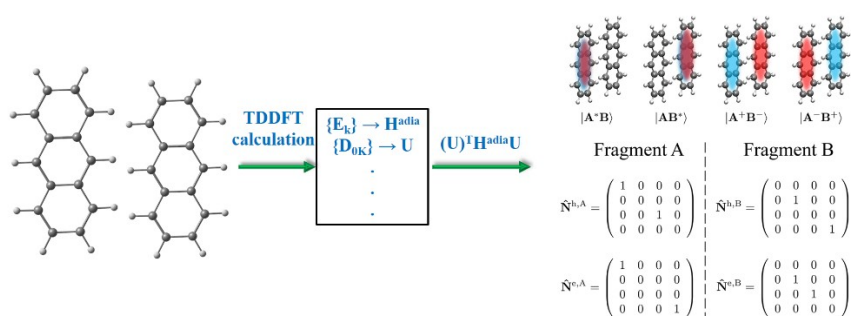

Figure S14. The process of constructing dimeric exciton states and CT states.<sup>3</sup>

Table S10. Coupling (meV) of A<sub>a</sub>-D<sub>a</sub> type PM6:Y6 complexes.

| DAN | Y6_CT1 | PM6_CT1 | PM6_CT2 | PM6_CT3 | PM6_CT4 | PM6_CT5 |
|-----|--------|---------|---------|---------|---------|---------|
| DA0 | 41.25  | 39.03   | 34.92   | 0.9     | 22.13   | 1.93    |
| DA1 | 22.53  | 40.83   | 23.78   | 0.91    | 9.48    | 9.45    |



|      |       |        |       |       |        |       |
|------|-------|--------|-------|-------|--------|-------|
| DA2  | 3.47  | 5.63   | 2.52  | 13.01 | 22.09  | 7.54  |
| DA3  | 11.87 | 16.41  | 34.45 | 8.59  | 29.31  | 18.49 |
| DA4  | 10.13 | 12.36  | 0.54  | 0.91  | 3.9    | 3.6   |
| DA5  | 24.91 | 28.41  | 19.8  | 4     | 19.88  | 0.25  |
| DA6  | 11.87 | 4.19   | 7.87  | 7.28  | 9.39   | 0.71  |
| DA7  | 10.17 | 8.8    | 9.03  | 2.29  | 0.49   | 17.9  |
| DA8  | 16.45 | 7.1    | 3.24  | 3.25  | 12.38  | 16.17 |
| DA9  | 41.83 | 104.35 | 50.95 | 48.61 | 29.89  | 7.72  |
| DA10 | 17.51 | 16.91  | 12.4  | 0.12  | 2.15   | 4.82  |
| DA11 | 17.77 | 10.09  | 9.34  | 1.06  | 18.76  | 18.86 |
| DA12 | 27.79 | 50.26  | 30.84 | 14.49 | 3.87   | 6.62  |
| DA13 | 50.45 | 84.55  | 82.12 | 6.05  | 101.55 | 40.2  |
| DA14 | 54.59 | 26.01  | 26.72 | 5.49  | 27.96  | 26.15 |
| DA15 | 6.63  | 11.09  | 6.38  | 3.17  | 37.25  | 7.15  |
| DA16 | 10.02 | 19.26  | 28.64 | 7.05  | 36.8   | 30.75 |
| DA17 | 24.15 | 16.34  | 0.09  | 13.43 | 22.35  | 3.55  |
| DA18 | 12.12 | 72.2   | 45.86 | 3.93  | 18.16  | 4.42  |
| DA19 | 34.93 | 27.42  | 18.27 | 10.66 | 23.88  | 7.87  |
| DA20 | 24.89 | 27.2   | 1.75  | 10.32 | 84.08  | 23.21 |
| DA21 | 49.31 | 16.94  | 1.69  | 0.66  | 9.79   | 8     |
| DA22 | 23.97 | 20.23  | 10.65 | 6.25  | 7.83   | 1.51  |
| DA23 | 14.9  | 53.51  | 60.28 | 25.43 | 70.02  | 14.01 |
| DA24 | 36.04 | 47.91  | 43.47 | 9.22  | 19.69  | 5.51  |
| DA25 | 20.5  | 2.47   | 19.89 | 10.87 | 47.35  | 22.45 |
| DA26 | 25.94 | 0.62   | 54.54 | 6.17  | 94.54  | 21.52 |
| DA27 | 72.14 | 74.51  | 62.11 | 1.26  | 45.77  | 3.76  |
| DA28 | 54.09 | 45.65  | 11.51 | 17.52 | 25.15  | 20.09 |
| DA29 | 49.35 | 12.87  | 8     | 3.57  | 3.03   | 12.61 |
| DA30 | 38.5  | 130.82 | 54.65 | 4.34  | 43.08  | 26.87 |
| DA31 | 4.4   | 4.53   | 2.26  | 0.33  | 14.35  | 32.28 |
| DA32 | 27.42 | 1      | 30.67 | 54.24 | 81.67  | 40.19 |
| DA33 | 5.99  | 2.71   | 0.25  | 2.96  | 28.18  | 34.2  |
| DA34 | 10.58 | 16.33  | 15.86 | 5.38  | 35.13  | 5.15  |
| DA35 | 34.05 | 73.49  | 46.89 | 14.27 | 34.88  | 6.18  |
| DA36 | 21.87 | 14.07  | 29.31 | 12.49 | 60.53  | 22.9  |
| DA37 | 10.22 | 82.17  | 92.71 | 34.72 | 91.66  | 24.15 |
| DA38 | 9.39  | 22.89  | 11.47 | 14.97 | 14.47  | 87.47 |
| DA39 | 10.16 | 5.05   | 10.92 | 2.66  | 31.52  | 18.32 |
| DA40 | 39.18 | 25.65  | 3.6   | 9.6   | 8.91   | 5.13  |
| DA41 | 5.18  | 43.65  | 40.76 | 11.43 | 55.9   | 27.56 |
| DA42 | 97.11 | 6.93   | 34.11 | 14.72 | 99.83  | 47.56 |
| DA43 | 60.98 | 14.27  | 2     | 3.75  | 12.66  | 3.01  |
| DA44 | 62.36 | 46.47  | 24.21 | 9.69  | 28.29  | 2.21  |
| DA45 | 21.41 | 44.9   | 27.16 | 6.53  | 9.71   | 12.17 |

|         |       |       |       |       |       |       |
|---------|-------|-------|-------|-------|-------|-------|
| DA46    | 50.76 | 31.4  | 26.2  | 6.29  | 29.8  | 3.91  |
| DA47    | 15.86 | 33.64 | 26.92 | 0.13  | 8.84  | 8.75  |
| DA48    | 2.03  | 3.04  | 28.4  | 23.21 | 55.58 | 42.63 |
| DA49    | 36.89 | 34.21 | 26.16 | 0.35  | 36.1  | 32.54 |
| Average | 27.71 | 30.80 | 25.12 | 9.57  | 32.80 | 17.00 |

Table S11. Coupling (meV) of A<sub>a</sub>-D<sub>d</sub> type PM6:Y6 complexes.

| DAN  | Y6_CT1 | PM6_CT1 | PM6_CT2 | PM6_CT3 | PM6_CT4 | PM6_CT5 |
|------|--------|---------|---------|---------|---------|---------|
| DA0  | 0.08   | 0.63    | 10.52   | 5.44    | 39.82   | 1.84    |
| DA1  | 22.17  | 21.08   | 3.84    | 7.73    | 7.2     | 7.61    |
| DA2  | 20.2   | 0.34    | 11.19   | 7.98    | 19.41   | 24.83   |
| DA3  | 19.59  | 2.96    | 2.46    | 1.47    | 5.51    | 0.27    |
| DA4  | 4.64   | 2.16    | 5.88    | 2.69    | 9.19    | 1.38    |
| DA5  | 16.67  | 15.75   | 11.17   | 13.49   | 19.8    | 10.11   |
| DA6  | 41.95  | 8.76    | 3.44    | 13.68   | 3.63    | 11.81   |
| DA7  | 10.15  | 15.92   | 11.64   | 4.36    | 5.64    | 0.74    |
| DA8  | 2.23   | 1.59    | 2.19    | 2.46    | 9.09    | 0.16    |
| DA9  | 14.95  | 40.8    | 42.35   | 0.52    | 11.43   | 2.58    |
| DA10 | 35.2   | 34.27   | 21.89   | 5.51    | 23.94   | 0.29    |
| DA11 | 17.67  | 11.2    | 6.75    | 1.22    | 1.7     | 5.27    |
| DA12 | 20.36  | 29.67   | 0.23    | 27.74   | 30.14   | 2.94    |
| DA13 | 13.42  | 9.96    | 0.99    | 10.97   | 10.61   | 8.34    |
| DA14 | 31.74  | 20.95   | 10.43   | 13.99   | 0.78    | 6.37    |
| DA15 | 7.02   | 20.59   | 9.7     | 24.41   | 17.64   | 2.1     |
| DA16 | 8.27   | 31.03   | 12.16   | 19.38   | 14.05   | 16.11   |
| DA17 | 12.26  | 25.78   | 18.64   | 9.98    | 18.12   | 4.16    |
| DA18 | 53.46  | 31.55   | 0.35    | 24.28   | 7.41    | 1.12    |
| DA19 | 23.35  | 6.44    | 12.06   | 1.75    | 1.27    | 27.25   |
| DA20 | 29.69  | 19.97   | 9.74    | 3.32    | 1.24    | 3.71    |
| DA21 | 27.08  | 16.72   | 7.35    | 5.22    | 8.11    | 1.6     |
| DA22 | 7.94   | 43.69   | 7.46    | 12.66   | 63.78   | 0.09    |
| DA23 | 0.23   | 1.59    | 4.32    | 0.15    | 8.53    | 14.56   |
| DA24 | 22     | 62.02   | 42.43   | 49.31   | 1.69    | 5.31    |
| DA25 | 22.28  | 14.78   | 13.04   | 4.97    | 0.38    | 4.48    |
| DA26 | 37.04  | 37.97   | 27.89   | 0.01    | 15.29   | 2.91    |
| DA27 | 4.86   | 8.52    | 5.9     | 9.82    | 17.4    | 4.72    |
| DA28 | 0.8    | 3.08    | 2.57    | 7.69    | 7.83    | 9.22    |
| DA29 | 21.24  | 1.2     | 1.85    | 2.97    | 1.8     | 0.17    |
| DA30 | 40.54  | 30.76   | 1.91    | 3.83    | 5.35    | 1.02    |
| DA31 | 5.73   | 26.04   | 9.09    | 7.21    | 21.84   | 5.24    |
| DA32 | 16.51  | 41.27   | 1.84    | 7.22    | 3.94    | 33.22   |
| DA33 | 15.03  | 43.36   | 15.38   | 0.36    | 1.91    | 1.11    |
| DA34 | 10.07  | 14.48   | 0.73    | 9.62    | 1.63    | 6.86    |
| DA35 | 40.91  | 18.66   | 9.18    | 9.07    | 23.33   | 5.25    |

|         |       |       |       |       |       |       |
|---------|-------|-------|-------|-------|-------|-------|
| DA36    | 1.49  | 9.56  | 0.08  | 10.51 | 5     | 3.77  |
| DA37    | 7.5   | 18.77 | 6.01  | 18.83 | 27.84 | 16.07 |
| DA38    | 17.3  | 10.26 | 2.09  | 16.23 | 57.56 | 27.37 |
| DA39    | 2.55  | 1.94  | 0.66  | 5.1   | 1.16  | 0.12  |
| DA40    | 1.41  | 0.15  | 1.38  | 1.64  | 15.03 | 15.86 |
| DA41    | 18.24 | 19.02 | 11.43 | 15.34 | 23.11 | 11.97 |
| DA42    | 1.31  | 4.25  | 4.22  | 11.28 | 23.23 | 8.52  |
| DA43    | 20.65 | 17.19 | 5.41  | 13.44 | 26.91 | 1.8   |
| DA44    | 18.82 | 44.03 | 31.87 | 15.44 | 53.88 | 3.98  |
| DA45    | 38.17 | 69.08 | 52.96 | 28.72 | 27.3  | 6.22  |
| DA46    | 76.08 | 69.78 | 22.13 | 18.53 | 17.48 | 3.66  |
| DA47    | 43.22 | 30.15 | 27.83 | 8.91  | 4.27  | 0.45  |
| DA48    | 21.98 | 38.51 | 29.65 | 10.29 | 21.51 | 4.3   |
| DA49    | 31.83 | 34.1  | 5.22  | 19.62 | 6.83  | 1.09  |
| Average | 19.55 | 21.64 | 11.19 | 10.52 | 15.03 | 6.79  |

Table S12. Coupling (meV) of A<sub>d</sub>-D<sub>a</sub> type PM6:Y6 complexes.

| DAN  | Y6_CT1 | PM6_CT1 | PM6_CT2 | PM6_CT3 | PM6_CT4 | PM6_CT5 |
|------|--------|---------|---------|---------|---------|---------|
| DA0  | 24.95  | 2.01    | 2.51    | 1.7     | 8.87    | 4.82    |
| DA1  | 8.4    | 23.08   | 6.02    | 17.48   | 38.29   | 1.13    |
| DA2  | 49.37  | 7.33    | 2.5     | 5.05    | 13.79   | 4.16    |
| DA3  | 58.8   | 71.31   | 27.5    | 8.34    | 10.65   | 11.29   |
| DA4  | 20.27  | 18.35   | 10.17   | 2.05    | 33.77   | 12.06   |
| DA5  | 43.72  | 28.82   | 33.6    | 6.11    | 11.97   | 4.29    |
| DA6  | 27.04  | 0.31    | 18.86   | 3.6     | 17.56   | 3.29    |
| DA7  | 41.27  | 16.43   | 11.69   | 0.73    | 2.94    | 3.01    |
| DA8  | 27.7   | 12.84   | 4.51    | 2.5     | 8.55    | 0.67    |
| DA9  | 35.82  | 35.5    | 10.27   | 0.04    | 1.05    | 0.2     |
| DA10 | 6.24   | 14.19   | 4.87    | 0.8     | 7.52    | 1.97    |
| DA11 | 26.3   | 58.33   | 16.22   | 2.54    | 7.92    | 16.01   |
| DA12 | 32.45  | 49.24   | 24.89   | 9.01    | 22.93   | 24.21   |
| DA13 | 42.54  | 27.31   | 21.1    | 5.89    | 8.66    | 13.53   |
| DA14 | 63.05  | 31.57   | 10.34   | 0.69    | 0.79    | 2.97    |
| DA15 | 5.49   | 3.07    | 4.89    | 0.53    | 2.76    | 2.56    |
| DA16 | 24.61  | 16.25   | 5.97    | 5.65    | 51.4    | 5.56    |
| DA17 | 15.86  | 33.64   | 26.92   | 0.13    | 8.84    | 8.75    |
| DA18 | 12.58  | 28.89   | 2.93    | 31.58   | 7.29    | 46.65   |
| DA19 | 15.84  | 2.75    | 35.88   | 7.41    | 48.62   | 10.79   |
| DA20 | 25.08  | 16.33   | 7.86    | 3.68    | 13.54   | 6.31    |
| DA21 | 4.02   | 32.6    | 12.4    | 2.99    | 0.05    | 5.44    |
| DA22 | 22.84  | 28.56   | 10.99   | 5.48    | 0.27    | 2.15    |
| DA23 | 6.54   | 35.4    | 0.91    | 2.7     | 0.22    | 8.45    |
| DA24 | 41.08  | 4.08    | 6.02    | 0.73    | 18.23   | 0.49    |
| DA25 | 50.02  | 6.62    | 16.57   | 9.2     | 15.33   | 12.27   |

|         |        |       |       |       |       |       |
|---------|--------|-------|-------|-------|-------|-------|
| DA26    | 24.58  | 4.39  | 22.77 | 0.02  | 11.87 | 0.48  |
| DA27    | 8.4    | 23.08 | 6.02  | 17.48 | 38.29 | 1.13  |
| DA28    | 35.95  | 0.86  | 3.83  | 3.39  | 13.68 | 10.95 |
| DA29    | 4.67   | 54.31 | 19.43 | 16.91 | 72.16 | 9.26  |
| DA30    | 47.74  | 61.74 | 43.38 | 7.76  | 0.01  | 37.77 |
| DA31    | 26.63  | 41.34 | 10.12 | 1.5   | 6.15  | 11.63 |
| DA32    | 58.3   | 46.63 | 21.35 | 3.03  | 15.31 | 30.77 |
| DA33    | 17.63  | 73.21 | 32.36 | 6.95  | 3.54  | 7.89  |
| DA34    | 45.96  | 26.07 | 24.11 | 0.63  | 26.94 | 12    |
| DA35    | 11.82  | 5.69  | 2.73  | 2.05  | 3.18  | 7.31  |
| DA36    | 2.3    | 40.25 | 23.42 | 1.01  | 0.39  | 17.56 |
| DA37    | 48.22  | 32.82 | 0.57  | 4.79  | 13.2  | 8.67  |
| DA38    | 11.06  | 2.61  | 18.31 | 12.35 | 25.6  | 39.1  |
| DA39    | 41.34  | 18.06 | 16.8  | 57.31 | 65.63 | 11.4  |
| DA40    | 27.91  | 18.71 | 0.42  | 1.8   | 16.46 | 15.6  |
| DA41    | 21.28  | 9.42  | 3.08  | 16.87 | 5.55  | 1.84  |
| DA42    | 10.11  | 32.52 | 10.48 | 8.91  | 4.82  | 3.65  |
| DA43    | 15.01  | 5.3   | 12.85 | 4.79  | 6.22  | 1.99  |
| DA44    | 26.28  | 18.06 | 15.62 | 0.25  | 1.47  | 0.92  |
| DA45    | 40.26  | 66.92 | 44.55 | 10.68 | 4.88  | 0.47  |
| DA46    | 11.13  | 21.08 | 0.87  | 11.21 | 2.31  | 2.16  |
| DA47    | 106.03 | 50.1  | 32.91 | 3.84  | 54.53 | 49.8  |
| DA48    | 32.38  | 43.57 | 4.12  | 3.03  | 50.76 | 13.34 |
| DA49    | 18.81  | 10.14 | 14.56 | 8.61  | 36.99 | 4.34  |
| Average | 28.51  | 26.23 | 14.42 | 6.83  | 16.83 | 10.26 |

Table S13. Coupling (meV) of A<sub>d</sub>-D<sub>d</sub> type PM6:Y6 complexes.

| DAN  | Y6_CT1 | PM6_CT1 | PM6_CT2 | PM6_CT3 | PM6_CT4 | PM6_CT5 |
|------|--------|---------|---------|---------|---------|---------|
| DA0  | 23.78  | 16.78   | 6.56    | 10.55   | 11.15   | 4.05    |
| DA1  | 46.54  | 20.7    | 9.69    | 11.58   | 7.33    | 1.8     |
| DA2  | 51.72  | 28.73   | 18.73   | 13.72   | 27.11   | 3.07    |
| DA3  | 23.22  | 54.62   | 59.83   | 16.13   | 55.21   | 5.92    |
| DA4  | 43.42  | 21.39   | 4.29    | 15.35   | 17.16   | 7.51    |
| DA5  | 47.51  | 20.76   | 8.19    | 3.81    | 15.27   | 17.98   |
| DA6  | 16.58  | 19.89   | 40.75   | 26.35   | 44.24   | 8.42    |
| DA7  | 66.92  | 32.62   | 4.32    | 4.72    | 24.48   | 17.78   |
| DA8  | 33.34  | 26.71   | 40.43   | 33.68   | 35.07   | 12.7    |
| DA9  | 41.7   | 11.64   | 22.31   | 32.39   | 3.51    | 4.14    |
| DA10 | 16.81  | 22.88   | 10.18   | 9.65    | 1.41    | 5.57    |
| DA11 | 31.83  | 29.4    | 1.1     | 16.13   | 4.78    | 6.34    |
| DA12 | 23.15  | 14.49   | 38.85   | 26.19   | 46.04   | 20.35   |
| DA13 | 13.17  | 43.51   | 33.31   | 37.89   | 46.65   | 19.14   |
| DA14 | 7.26   | 2.44    | 0.19    | 0.73    | 31.48   | 0.06    |
| DA15 | 48.21  | 4.9     | 0.55    | 8.05    | 5.18    | 3.79    |

|         |        |        |         |         |        |         |
|---------|--------|--------|---------|---------|--------|---------|
| DA16    | 45.72  | 29.46  | 10.63   | 19.08   | 28.01  | 1.75    |
| DA17    | 16.78  | 5.7    | 29.3    | 16.54   | 26.01  | 7.2     |
| DA18    | 40.54  | 30.76  | 1.91    | 3.83    | 5.35   | 1.02    |
| DA19    | 28.63  | 0.14   | 5.34    | 4.7     | 26.13  | 5.97    |
| DA20    | 8.16   | 24.28  | 15      | 9.2     | 32.95  | 16.84   |
| DA21    | 43.06  | 32.89  | 16.13   | 11.81   | 20.86  | 3.59    |
| DA22    | 69.81  | 74.4   | 58.6    | 31.35   | 25.92  | 3.84    |
| DA23    | 58.29  | 8.71   | 11.76   | 19.05   | 14.93  | 0.91    |
| DA24    | 18.41  | 10.13  | 20.99   | 15.06   | 10.98  | 2.14    |
| DA25    | 11.53  | 21.71  | 42.11   | 11.83   | 24.91  | 8.14    |
| DA26    | 38.83  | 26.61  | 24.85   | 13.61   | 35.52  | 12.03   |
| DA27    | 75.5   | 46.95  | 5.74    | 12.12   | 12.16  | 9.42    |
| DA28    | 29.19  | 22.29  | 20.64   | 15.75   | 56.2   | 11.47   |
| DA29    | 85.47  | 41.64  | 2.77    | 1.5     | 39.79  | 11.83   |
| DA30    | 64.24  | 29.67  | 2.26    | 7.86    | 34.81  | 7.66    |
| DA31    | 13.72  | 35.27  | 31.93   | 40.86   | 57.26  | 47.01   |
| DA32    | 25.31  | 11.52  | 13.44   | 6.09    | 25.02  | 4.19    |
| DA33    | 1.98   | 32.35  | 26.58   | 4.11    | 55.09  | 8.95    |
| DA34    | 9.59   | 9.92   | 30.87   | 26.54   | 34.06  | 0.92    |
| DA35    | 40.24  | 28.15  | 7.72    | 23.06   | 21.97  | 0.13    |
| DA36    | 46.71  | 47.09  | 60.23   | 30      | 1.24   | 6.49    |
| DA37    | 77.77  | 9.32   | 4.42    | 36.53   | 48.13  | 25.51   |
| DA38    | 16.73  | 35.38  | 11.29   | 52.85   | 1.13   | 21.47   |
| DA39    | 43.08  | 17.96  | 21.73   | 15.12   | 47.33  | 17.15   |
| DA40    | 24.5   | 23.34  | 28.02   | 6       | 34.21  | 20.12   |
| DA41    | 37.33  | 4.28   | 10.34   | 16.28   | 7.66   | 1.91    |
| DA42    | 54.48  | 21.93  | 8.08    | 34.86   | 52.45  | 38.66   |
| DA43    | 12.58  | 20.72  | 48.8    | 40.45   | 33.4   | 11.64   |
| DA44    | 20.48  | 35.38  | 19.3    | 20.88   | 13.25  | 7.85    |
| DA45    | 31.95  | 38.57  | 1.77    | 3.21    | 13.09  | 16.46   |
| DA46    | 36.72  | 11.46  | 31.18   | 24.02   | 43.75  | 11.38   |
| DA47    | 50.98  | 32.59  | 14.1    | 3.24    | 31.27  | 23.42   |
| DA48    | 29.28  | 41.18  | 8.11    | 4.78    | 41.11  | 12.25   |
| DA49    | 27.45  | 17.44  | 0.6     | 0.78    | 14.93  | 2.03    |
| Average | 35.404 | 25.013 | 18.9164 | 16.9974 | 26.939 | 10.3994 |

Table S14. Coupling (meV) of A<sub>da</sub>-D<sub>da</sub> type PM6:Y6 complexes.

| DAN | Y6_CT1 | PM6_CT1 | PM6_CT2 | PM6_CT3 | PM6_CT4 | PM6_CT5 |
|-----|--------|---------|---------|---------|---------|---------|
| DA0 | 45.36  | 23.2    | 35.99   | 16.39   | 13.75   | 4.42    |
| DA1 | 24.56  | 2.1     | 7.4     | 4.63    | 2.67    | 18.57   |
| DA2 | 51.89  | 24.87   | 1.44    | 6.83    | 0.54    | 4.93    |
| DA3 | 32.64  | 70.38   | 23.35   | 42.11   | 7.5     | 43.24   |
| DA4 | 34.75  | 26.01   | 4.94    | 21.55   | 33.71   | 65.36   |
| DA5 | 52.46  | 22.97   | 9.64    | 5.53    | 31.15   | 3.01    |

|      |       |       |       |       |       |        |
|------|-------|-------|-------|-------|-------|--------|
| DA6  | 22.94 | 18.83 | 4.28  | 11.52 | 39.87 | 13.54  |
| DA7  | 60.12 | 58.14 | 79.48 | 29.46 | 7.92  | 13.21  |
| DA8  | 47.88 | 36.1  | 1.22  | 2.38  | 40.85 | 36.85  |
| DA9  | 29.98 | 12.2  | 7.43  | 0.87  | 16.29 | 6.83   |
| DA10 | 65.15 | 50.8  | 30    | 70.54 | 34.08 | 4.67   |
| DA11 | 0.29  | 9.2   | 1.17  | 2.2   | 4.31  | 19.1   |
| DA12 | 65.75 | 46.98 | 75.94 | 11.53 | 3.8   | 18.53  |
| DA13 | 86.28 | 62.24 | 41.91 | 20.18 | 37.85 | 51.65  |
| DA14 | 14.66 | 4.04  | 9.77  | 9.14  | 3.72  | 0.49   |
| DA15 | 32.8  | 34.23 | 31.77 | 10.54 | 11.81 | 5.33   |
| DA16 | 37.36 | 43.8  | 25.53 | 10.09 | 50.08 | 82.61  |
| DA17 | 39.11 | 23.42 | 18.35 | 14.99 | 53.57 | 41.89  |
| DA18 | 50.56 | 2.63  | 18.6  | 3.34  | 2.4   | 1.29   |
| DA19 | 30.07 | 14.52 | 1.35  | 15.3  | 33.42 | 9.89   |
| DA20 | 51.71 | 11.11 | 29.19 | 22.45 | 29.96 | 12.54  |
| DA21 | 22.2  | 1.79  | 6.34  | 3.4   | 13.31 | 1.02   |
| DA22 | 13.74 | 26.96 | 19.58 | 12.08 | 11    | 121.33 |
| DA23 | 41.56 | 23.03 | 30.21 | 7.36  | 4.37  | 22.24  |
| DA24 | 16.56 | 58.78 | 24.04 | 27.84 | 7.23  | 12.23  |
| DA25 | 48.62 | 26.78 | 41.44 | 28.33 | 5.65  | 21.96  |
| DA26 | 41.08 | 73.5  | 69.02 | 34.84 | 4.67  | 19.53  |
| DA27 | 86.6  | 34.79 | 28.47 | 33.5  | 4.12  | 33.53  |
| DA28 | 29.98 | 12.2  | 7.43  | 0.87  | 16.29 | 6.83   |
| DA29 | 31.73 | 56.95 | 4.51  | 4.09  | 3.53  | 8.63   |
| DA30 | 74.9  | 48.97 | 41.06 | 11.98 | 8.15  | 31.28  |
| DA31 | 47.98 | 15    | 2.75  | 8.03  | 15.63 | 17.65  |
| DA32 | 25.9  | 35.18 | 34.62 | 25.43 | 8.68  | 8.89   |
| DA33 | 57.64 | 23.66 | 39.75 | 9.24  | 9.47  | 0.13   |
| DA34 | 17.65 | 8.2   | 7.44  | 4.73  | 12.1  | 12.45  |
| DA35 | 37.9  | 4.51  | 7.35  | 5.36  | 84.66 | 43.95  |
| DA36 | 65.75 | 46.98 | 75.94 | 11.53 | 3.8   | 18.53  |
| DA37 | 14.66 | 4.04  | 9.77  | 9.14  | 3.72  | 0.49   |
| DA38 | 19.63 | 56.24 | 4.36  | 6.41  | 70.66 | 43.46  |
| DA39 | 18.93 | 41.01 | 8.01  | 10.88 | 11.62 | 24.19  |
| DA40 | 51.71 | 11.11 | 29.19 | 22.45 | 29.96 | 12.54  |
| DA41 | 66.02 | 0.84  | 21.03 | 24.81 | 8.74  | 13.34  |
| DA42 | 7.31  | 1.5   | 2.72  | 8.85  | 3.45  | 6.66   |
| DA43 | 45.82 | 25.6  | 13.73 | 18.6  | 53.47 | 2.85   |
| DA44 | 43.1  | 16.06 | 2.91  | 1.52  | 44.34 | 53.38  |
| DA45 | 14.4  | 43.44 | 22.59 | 0.29  | 4.03  | 72.29  |
| DA46 | 10.26 | 3.69  | 18.54 | 9.57  | 21.42 | 16.73  |
| DA47 | 10.08 | 69.47 | 57.15 | 27.58 | 4.51  | 18.63  |
| DA48 | 27.95 | 28.87 | 25.8  | 13.05 | 9.99  | 15.67  |
| DA49 | 28.9  | 11.19 | 5.68  | 17.92 | 18.25 | 36.69  |

---

|         |       |       |       |       |       |       |
|---------|-------|-------|-------|-------|-------|-------|
| Average | 37.89 | 28.16 | 22.40 | 14.62 | 19.12 | 23.10 |
|---------|-------|-------|-------|-------|-------|-------|

Table S15. Coupling (meV) of  $A_{da}$ - $D_{ad}$  type PM6:Y6 complexes.

| DAN  | Y6_CT1 | PM6_CT1 | PM6_CT2 | PM6_CT3 | PM6_CT4 | PM6_CT5 |
|------|--------|---------|---------|---------|---------|---------|
| DA0  | 67.25  | 19.07   | 12.35   | 55.61   | 33.54   | 44.75   |
| DA1  | 0.7    | 14.4    | 24.44   | 0.47    | 24      | 9.99    |
| DA2  | 54.42  | 21.44   | 9.56    | 20.99   | 9.61    | 25.41   |
| DA3  | 10.79  | 11.87   | 17.59   | 14.16   | 44.49   | 44.66   |
| DA4  | 7.22   | 52.46   | 52.63   | 3.68    | 30.3    | 12.76   |
| DA5  | 66.17  | 74.2    | 36.28   | 25.62   | 19.36   | 0.5     |
| DA6  | 23.71  | 25.86   | 36.26   | 17.67   | 19.21   | 10.54   |
| DA7  | 63.86  | 1.87    | 31.95   | 11.93   | 46.57   | 19.77   |
| DA8  | 7.29   | 12.85   | 19.89   | 5.55    | 34.24   | 18.78   |
| DA9  | 59.19  | 11.85   | 23.74   | 11      | 11.78   | 26.26   |
| DA10 | 40.13  | 31.05   | 20.39   | 0.74    | 21.18   | 25.25   |
| DA11 | 44.19  | 52.81   | 2.56    | 42.19   | 61.08   | 48.9    |
| DA12 | 36.01  | 19.12   | 55.44   | 21.32   | 4.63    | 20.98   |
| DA13 | 68.09  | 48.75   | 13.55   | 19.7    | 9.1     | 43.88   |
| DA14 | 54.64  | 2.84    | 17.29   | 1.25    | 18.21   | 17.36   |
| DA15 | 31.74  | 18.08   | 0.22    | 10.97   | 1.78    | 6.79    |
| DA16 | 23.87  | 36.85   | 7.07    | 0.15    | 32.92   | 5.25    |
| DA17 | 54.61  | 29.74   | 47.26   | 47.31   | 35.23   | 40.91   |
| DA18 | 22.09  | 57.78   | 56.72   | 21.87   | 17.53   | 13.67   |
| DA19 | 71.56  | 78.64   | 82.15   | 12.7    | 9.96    | 3.66    |
| DA20 | 49.2   | 2.94    | 9.17    | 0.12    | 2.37    | 7.95    |
| DA21 | 37.2   | 41.88   | 11.45   | 9.16    | 62.14   | 47.34   |
| DA22 | 13.07  | 27.31   | 11.76   | 6.03    | 16.91   | 11.74   |
| DA23 | 73.46  | 21.76   | 3.17    | 0.04    | 39.73   | 2.19    |
| DA24 | 43.96  | 34.24   | 57.49   | 3.79    | 50.67   | 32.45   |
| DA25 | 19.44  | 10.72   | 26.05   | 11.81   | 14.75   | 41.77   |
| DA26 | 41.91  | 28.92   | 16.13   | 10.49   | 69.71   | 31.37   |
| DA27 | 70.73  | 44.61   | 17.17   | 47.01   | 10.31   | 14.32   |
| DA28 | 23.68  | 59.1    | 19.91   | 20.49   | 31.88   | 33.66   |
| DA29 | 21.25  | 41.93   | 10.09   | 3.64    | 51.98   | 2.62    |
| DA30 | 5.87   | 8.83    | 1.42    | 1.86    | 13.2    | 7.74    |
| DA31 | 14.4   | 34.71   | 12.76   | 3.24    | 48.47   | 22.02   |
| DA32 | 60.52  | 68.42   | 54.21   | 1.12    | 0.29    | 3.43    |
| DA33 | 10.56  | 47.46   | 3.1     | 3.61    | 34      | 6.98    |
| DA34 | 29.87  | 26.72   | 10.29   | 20.85   | 15.91   | 24.89   |
| DA35 | 40.64  | 11.93   | 24.41   | 0.1     | 31.74   | 5.21    |
| DA36 | 63.46  | 69.55   | 60.24   | 11.68   | 21.39   | 35.15   |
| DA37 | 14.62  | 8.63    | 0.43    | 1.91    | 7.74    | 1.99    |
| DA38 | 38.6   | 53.14   | 68.72   | 4.73    | 23.55   | 12.87   |

|         |       |       |       |       |       |       |
|---------|-------|-------|-------|-------|-------|-------|
| DA39    | 24.43 | 32.72 | 20.34 | 12.59 | 25.67 | 5.75  |
| DA40    | 42.44 | 21.88 | 11.4  | 18.26 | 16.29 | 14.54 |
| DA41    | 35.01 | 13.83 | 43.47 | 8.94  | 39.98 | 14.57 |
| DA42    | 10.51 | 3.29  | 22.85 | 2.14  | 61.63 | 42.46 |
| DA43    | 64.56 | 69.08 | 16.97 | 10.18 | 11.44 | 41.02 |
| DA44    | 3.17  | 15.95 | 4.06  | 3.76  | 5.92  | 5.62  |
| DA45    | 28.63 | 39.29 | 30.56 | 16.5  | 10.32 | 9.5   |
| DA46    | 77.02 | 15.61 | 5.29  | 35.86 | 2.34  | 12.96 |
| DA47    | 59.09 | 34.32 | 14.1  | 0.03  | 38.18 | 56.17 |
| DA48    | 54.72 | 21.98 | 11.57 | 22.04 | 6.49  | 0.94  |
| DA49    | 33.4  | 10.07 | 5.41  | 17.36 | 9.97  | 23.99 |
| Average | 38.25 | 30.84 | 23.42 | 13.08 | 25.19 | 20.26 |

## References

1. M. Deng, H. Meng, X. Xu, J. Tang, L. Yu, R. Li and Q. Peng, *Chem. Eng. J.*, 2022, **440**.
2. F. Pedregosa, G. Varoquaux, A. Gramfort, V. Michel, B. Thirion, O. Grisel, M. Blondel, P. Prettenhofer, R. Weiss, V. Dubourg, J. Vanderplas, A. Passos, D. Cournapeau, M. Brucher, M. Perrot and E. Duchesnay, *J. Mach. Learn. Res.*, 2011, **12**, 2825-2830.
3. Y. C. Wang, S. Feng, W. Liang and Y. Zhao, *J. Phys. Chem. Lett.*, 2021, **12**, 1032-1039.
